# Supplementary material
Source: MDPI journal article supplement (https://www.mdpi.com/2073-4352/14/3/227)

## Supplementary materials

### New data on crystal phases in the system $\text{MgSO}_4 - \text{OC}(\text{NH}_2)_2 - \text{H}_2\text{O}$

Rositsa Nikolova \*, Vladislav Kostov-Kytin, Nadia Petrova, Krasimir Kosev, Rositsa Titorenkova and Gergana Vel-yanova

Institute of Mineralogy and Crystallography, Bulgarian Academy of Sciences, Akad. G. Bonchev bl. 107, Sofia 1113, Bulgaria; rosica.pn@clmc.bas.bg (RN); vkytin@abv.bg (VK); nadia5@mail.bg (NP) k\_koshev@yahoo.com (KK) rositsatitorenkova@imc.bas.bg (RT) gergana315@gmail.com (GV)

\* Correspondence: rosica.pn@clmc.bas.bg; Tel.: +359885099158

Table S1. Distances (Å) and angles (°) describing hydrogen bonds in  $\text{Mg}(\text{SO}_4)\cdot\text{OC}(\text{NH}_2)_2\cdot 2\text{H}_2\text{O}$ .

| D-H A                      | d(D-H) | d(H...A) | < D-H...A | d(D...A) |
|----------------------------|--------|----------|-----------|----------|
| N1-H1A...O6                | 0.860  | 2.342    | 147.22    | 3.100    |
| N1-H1B...O4 <sup>i</sup>   | 0.860  | 2.261    | 178.11    | 3.121    |
| N2-H2A...O2 <sup>ii</sup>  | 0.860  | 2.439    | 148.95    | 3.207    |
| N2-H2B...O3 <sup>i</sup>   | 0.860  | 2.384    | 155.88    | 3.188    |
| O6-H6A...O4 <sup>iii</sup> | 0.881  | 2.224    | 157.51    | 3.054    |
| O6-H6B...O <sup>iv</sup>   | 0.935  | 2.144    | 148.77    | 2.983    |
| O7-H7A...O2                | 0.937  | 2.798    | 151.23    | 2.733    |
| O7-H7B... O2 <sup>ii</sup> | 0.893  | 2.131    | 139.29    | 2.868    |

i) x,y-1,z; ii) x-1,y,z; iii) -x+2,-y+1,-z+1; iv) x+1,y,z; v) x,y-1,z; vi) x+1, y, z.

Table S2. Distances (Å) and angles (°) describing hydrogen bonds in  $\text{Mg}(\text{SO}_4)\cdot\text{OC}(\text{NH}_2)_2\cdot 3\text{H}_2\text{O}$ .

| D-H A                      | d(D-H) | d(H...A) | < D-H...A | d(D...A) |
|----------------------------|--------|----------|-----------|----------|
| N1-H1B...O2 <sup>i</sup>   | 0.860  | 2.201    | 160.00    | 3.023    |
| N2-H2A...O7                | 0.860  | 2.342    | 145.78    | 3.091    |
| N2-H2B...O4 <sup>ii</sup>  | 0.860  | 2.181    | 148.51    | 2.949    |
| O5-H5A...O2 <sup>iii</sup> | 0.952  | 1.814    | 177.02    | 2.765    |
| O5-H5B...O <sup>iii</sup>  | 0.903  | 1.954    | 167.60    | 2.842    |
| O6-H6B...O2 <sup>iv</sup>  | 0.827  | 2.132    | 149.71    | 2.876    |

|                           |       |       |        |       |
|---------------------------|-------|-------|--------|-------|
| O6-H6B...O3 <sup>iv</sup> | 0.827 | 2.592 | 131.70 | 2.876 |
| O7-H7A...O4 <sup>v</sup>  | 0.971 | 1.778 | 167.07 | 2.733 |
| O7-H7B...O6 <sup>vi</sup> | 0.903 | 2.161 | 176.64 | 3.063 |

i)-x,-y-1/2,-z+1; ii) -x+1,y-1/2,-z+1; iii) x+1,y,z; iv)- x,y-1/2,-z+2; v)x,y-1,z; vi)x+1, y, z.

Table S3. Coordination polyhedral of Mg atoms in the known  $\text{MgSO}_4 \cdot n\text{OC}(\text{NH}_2)_2 \cdot m\text{H}_2\text{O}$  compounds.

| compound                                                                    | Coordination number of Mg polyhedra | Type and number of SO <sub>4</sub> , Urea and H <sub>2</sub> O ligands |
|-----------------------------------------------------------------------------|-------------------------------------|------------------------------------------------------------------------|
| $\text{MgSO}_4 \cdot \text{OC}(\text{NH}_2)_2 \cdot 2\text{H}_2\text{O}$    | 6                                   | 4SO <sub>4</sub> , 2H <sub>2</sub> O;                                  |
|                                                                             | 6                                   | 2SO <sub>4</sub> , 2Urea, 2H <sub>2</sub> O                            |
| $\text{MgSO}_4 \cdot \text{OC}(\text{NH}_2)_2 \cdot 3\text{H}_2\text{O}$    | 6                                   | 2SO <sub>4</sub> , 3H <sub>2</sub> O; 1Urea                            |
| $\text{MgSO}_4 \cdot 4\text{OC}(\text{NH}_2)_2 \cdot \text{H}_2\text{O}$    | 6                                   | 1SO <sub>4</sub> , 4Urea, 1H <sub>2</sub> O                            |
| $\text{MgSO}_4 \cdot 6\text{OC}(\text{NH}_2)_2 \cdot 0.5\text{H}_2\text{O}$ | 6                                   | 6Urea                                                                  |

Figure S1 – 3D packing of  $\text{MgSO}_4 \cdot \text{OC}(\text{NH}_2)_2 \cdot 2\text{H}_2\text{O}$  The hydrogen bonding contacts are marked with dashed lines.

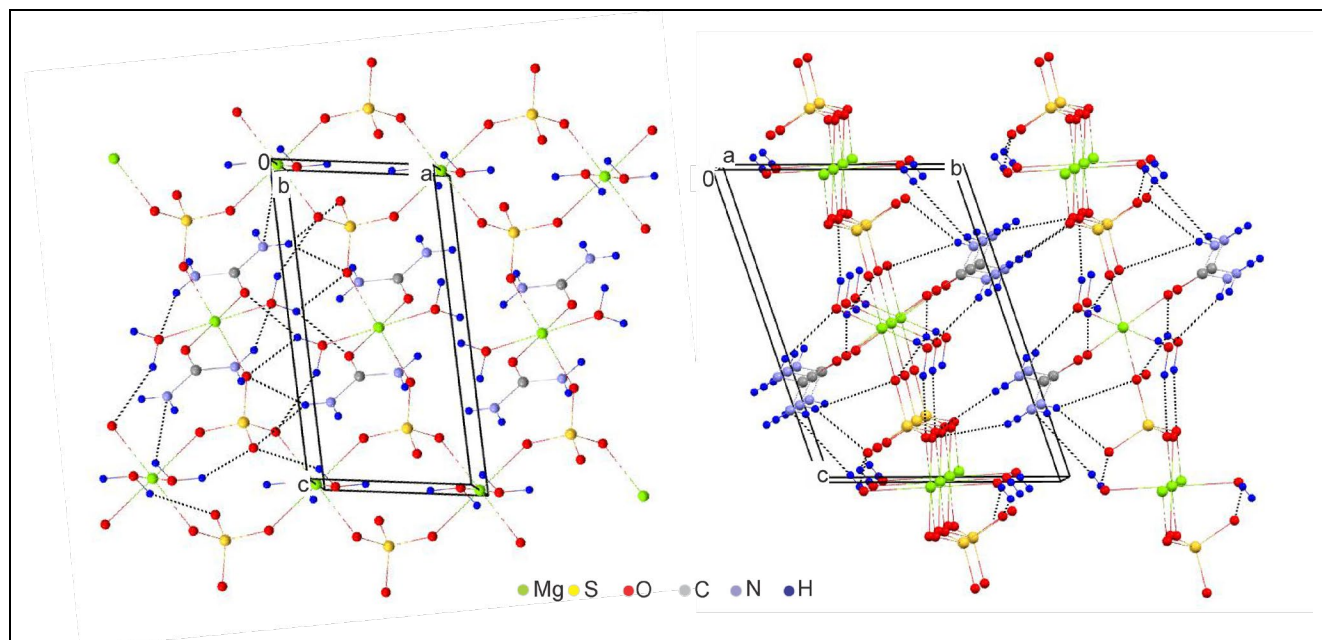

Figure S2 – 3D packing of  $\text{MgSO}_4 \cdot \text{OC}(\text{NH}_2)_2 \cdot 3\text{H}_2\text{O}$ . The hydrogen bonding contacts are marked with dashed lines.

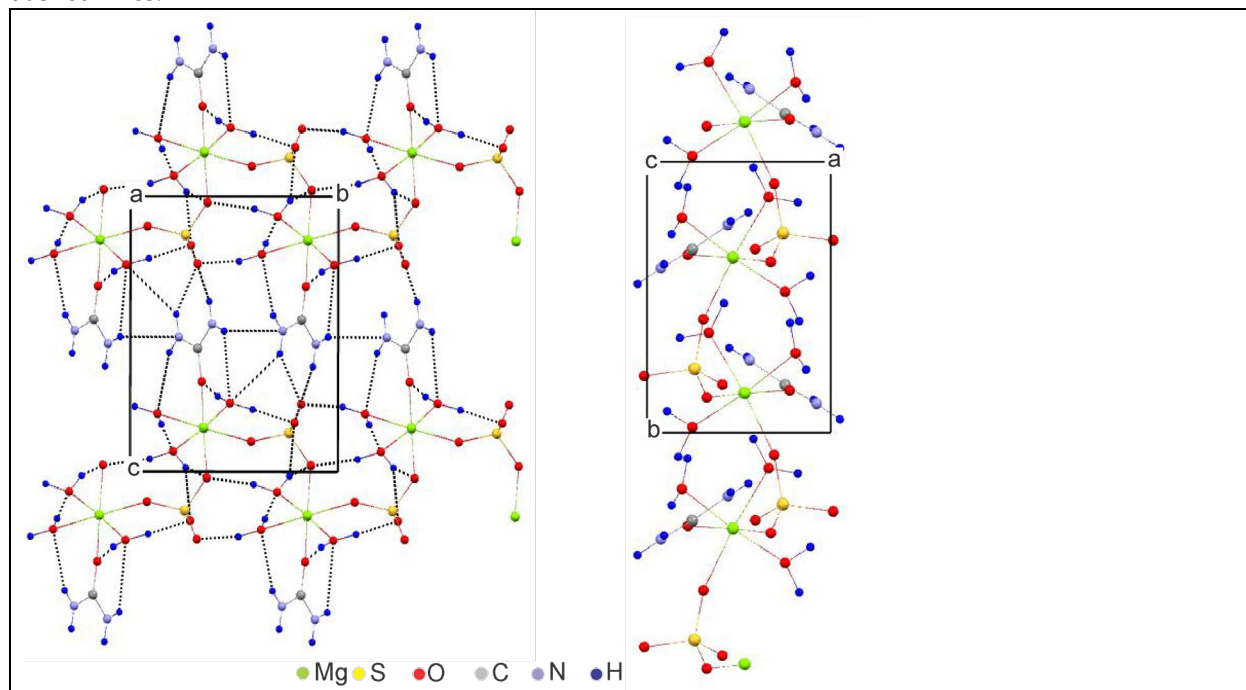

Supplement: s1 [file s1]
